# Supplementary material for: Genome-Wide Screening and Functional Analysis Reveal That the Specific microRNA nlu-miR-173 Regulates Molting by Targeting Ftz-F1 in Nilaparvata lugens
Source: Front Physiol. 2018 Dec 20;9:1854. doi: 10.3389/fphys.2018.01854 (PMC6306441; doi:10.3389/fphys.2018.01854)
Supplement: Table S4 — The expression levels of miRNAs and targets in Figure 3. [file Table_4.XLS]

## Sheet: Fig3
conserved miRNAs					conserved miRNAs					novel miRNAs
let-7	NA	-1.14024			miR-133	1.13593	1.85897			nlu-miR-14	1.20804	NA
flap endonuclease	NA	0.582811			NLU024470.2	-0.00826242	-0.672847			exonuclease 1	-0.7714	NA
miR-1a-5p	NA	1.93645			miR-193	1.54601	NA			nlu-miR-29	1.37949	NA
XLOC_021181	NA	-0.393162			XLOC_025697	-1.01241	NA	**		cAMP response element-binding protein	-0.912341	NA	*
XLOC_031973	NA	-0.28226			XLOC_030851	-0.526981	NA
GTPase	NA	-0.219743			cell wall protein cwl1	-0.190406	NA			nlu-miR-34	-1.8625	NA
										laccase-2	0.572554	NA
miR-8-5p	NA	-1.38026			miR-316-5p	NA	2.43078
trehalase 1	NA	1.65	**		Sterile alpha and TIR motif-containing protein	NA	-1.34523	**		nlu-miR-124	1.63227	NA
Acetyl CoA dehydrogenase	NA	0.247286			e3 ubiquitin-protein ligase	NA	-0.690793	*		S-adenosylmethionine decarboxylase	-0.528806	NA
					XLOC_021105	NA	-0.334727
miR-14	NA	2.50201			NF-kappa-B-repressing factor	NA	-0.257409			nlu-miR-173	NA	-1.18442
XLOC_021388	NA	-1.1948	**		ATP phosphoribosyltransferase	NA	-0.212719			ecdysone response nuclear receptor Ftz-F1	NA	2.49109	**
XLOC_030811	NA	-1.07006	**
XLOC_020255	NA	-0.634847	*		miR-750	NA	1.21574			nlu-miR-186	-5.39232	-5.12928
mitotic-specific cyclin protein	NA	-0.47422			Serine/threonine-protein phosphatase 6	NA	-0.859676	*		alpha-tocopherol transfer protein	1.72043	4.118	**
Proliferating cell nuclear antigen	NA	-0.310274								dual oxidase maturation factor	1.94842	1.62463	**
					miR-965	NA	2.60921
miR-34	NA	-1.17893			XLOC_015637	NA	-0.0801542
Est1	NA	1.31187	**
JHBP（takeout）	NA	0.840788	*		miR-993-5p	3.00171	NA
Protein FAM45B	NA	0.525478			activating signal cointegrator 1	-0.53597	NA
XLOC_027086	NA	0.360418			Serine/threonine-protein phosphatase 6	-0.0786418	NA
RNA binding protein	NA	0.353329
					miR-1000	NA	1.86461
miR-71-3p	-1.82436	3.20167			XLOC_025207	NA	-0.834424	*
leucine-rich repeat flightless-interacting protein 2	-0.483038	-0.342381			serine palmitoyltransferase	NA	-0.485235
					5'-nucleotidase	NA	-0.452465
miR-87a-3p	1.51616	1.58449			cAMP-dependent protein kinase	NA	-0.170549
XLOC_028940	-0.39092	-1.21896	**		ATP-dependent Clp protease	NA	-0.0361992
miR-92a	NA	1.67309			miR-2796-5p	1.30253	3.90449
m7GpppX diphosphatase	NA	-0.47422			sugar transporter 14	-0.528984	-0.984004	*
					Fasciclin-1 precursor	-0.0566079	-0.448216
miR-124	1.60066	-2.44201
glucosylceramidase	-0.627383	0.0915627
